# Supplementary material for: (R/S)-lactate/2-hydroxybutyrate dehydrogenases in and biosynthesis of block copolyesters by Ralstonia eutropha
Source: PubMed Central journal article supplement (PMC10656315; doi:10.1007/s00253-023-12797-6), 2023-09-29
Supplement: 253_2023_12797_MOESM1_ESM.pdf [file 253_2023_12797_MOESM1_ESM.pdf]

Additional file:

**(*R/S*)-Lactate/2-hydroxybutyrate dehydrogenases in and biosynthesis of block copolyesters by *Ralstonia eutropha***

Shizuru Ishihara<sup>1)</sup>, Izumi Orita<sup>1)</sup>, Ken'ichiro Matsumoto<sup>2)</sup>, Toshiaki Fukui<sup>1)</sup>

- 1) School of Life Science and Technology, Tokyo Institute of Technology, 4259 Nagatsuta, Midori-ku, Yokohama 226-8501, Japan
- 2) Division of Biotechnology and Macromolecular Chemistry, Graduate School of Engineering, Hokkaido University, N13W8, Kita-ku, Sapporo 060-8628, Japan

\*Corresponding author

Toshiaki Fukui

School of Life Science and Technology

Tokyo Institute of Technology

B-37 4259 Nagatsuta, Midori-ku, Yokohama 226-8501, Japan

Tel/Fax: +81-45-924-5766

e-mail: [tfukui@bio.titech.ac.jp](mailto:tfukui@bio.titech.ac.jp)

Supporting Information

Fig. S1

Fig. S2

Fig. S3

Fig. S4

Fig. S5

Table S1

Table S2

Table S3

Table S4

Table S5

Table S6

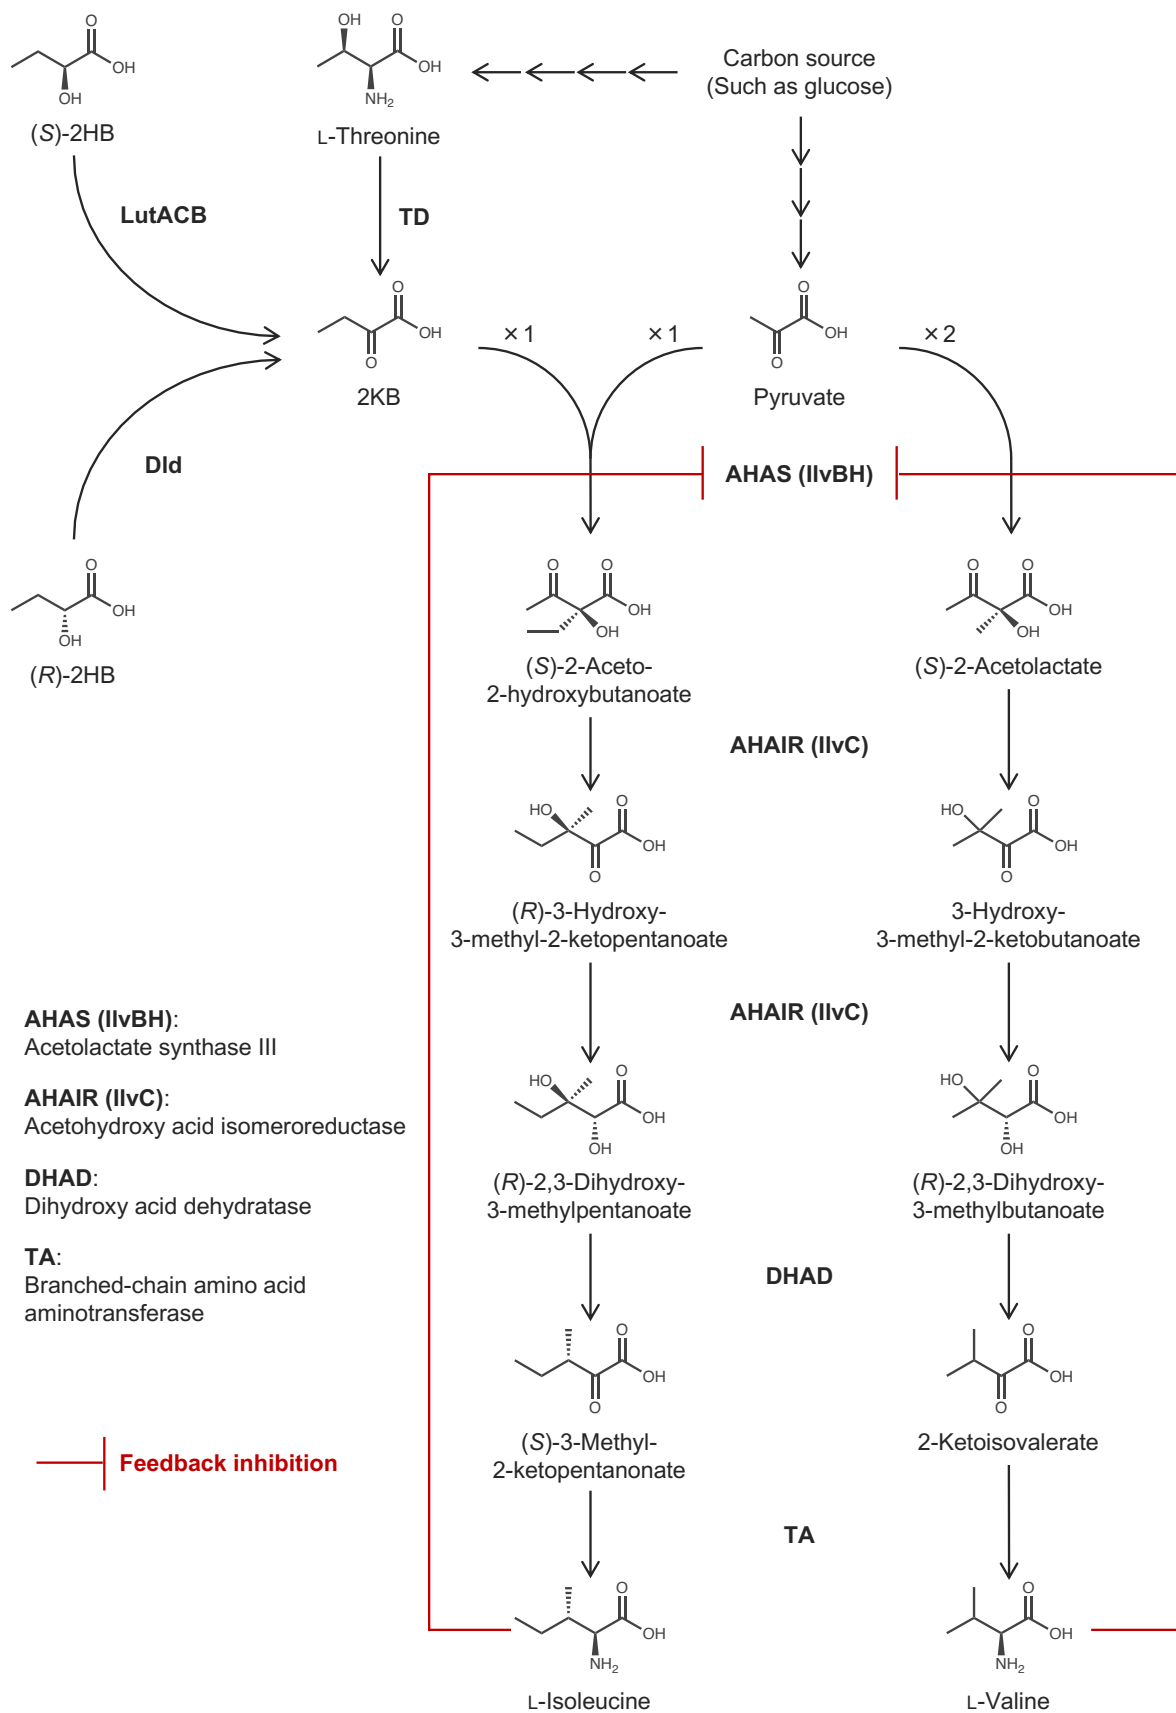

Fig. S1. The biosynthesis pathway of L-isoleucine and L-valine in *R. eutropha*.

TD, L-threonine dehydratase; Dld, cytochrome-dependent D-lactate dehydrogenase; LutACB, [Fe-S] cluster protein-dependent L-lactate utilization system; AHAS (IlvBH), acetolactate synthase III; AHAIR (IlvC), acetohydroxy acid isomeroreductase; DHAD, dihydroxy acid dehydratase; TA, branched-chain amino acid aminotransferase.

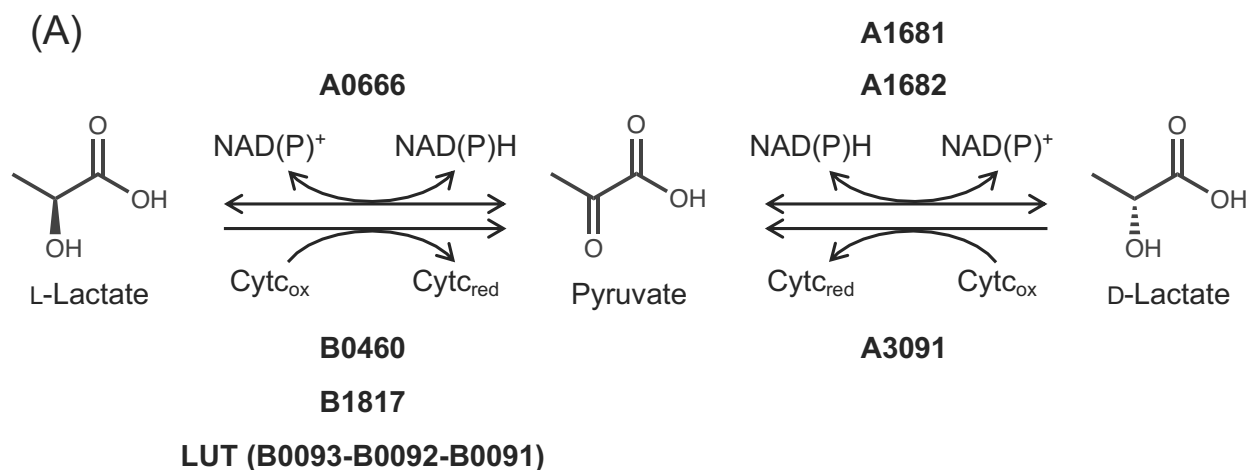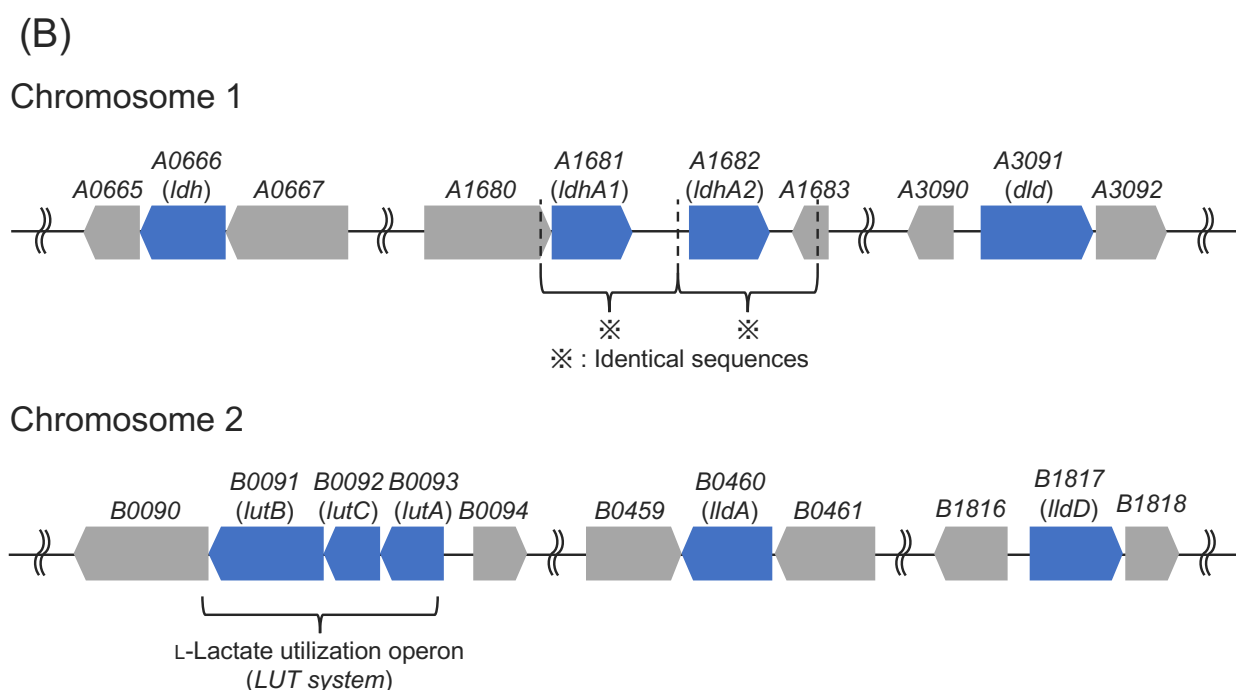

Fig. S2. Predicted reactions catalyzed by D/L-lactate dehydrogenase homologs in *R. eutropha* H16 (A), and their gene loci on the chromosomes (B). A0665, putative bifunctional transglycosylase and transpeptidase; A0666, NAD(P)H-dependent L-lactate dehydrogenase; A0667, sodium: sulfate symporter transmembrane region; A1680, predicted permease; A1681 and A1682, NAD(P)H-dependent D-lactate dehydrogenases; A1683, predicted acetyltransferase; A3090, cobalamin adenosyltransferase; A3091, cytochrome-dependent D-lactate dehydrogenase; A3092, transcriptional regulator, LysR family; B0090, lactate permease; B0091, L-lactate dehydrogenase complex, iron-sulfur cluster-binding protein (LldF/LutB)); B0092, L-lactate dehydrogenase complex, conserved hypothetical protein (LldG/LutC); B0093, L-lactate dehydrogenase complex, Fe-S oxidoreductase protein (LldE/LutA); B0094, transcriptional regulator, GntR-family; B0459, acetylornithine deacetylase; B0460, cytochrome-dependent L-lactate dehydrogenase; B0461, predicted flavoprotein involved in  $\text{K}^+$  transport; B1816, transcriptional regulator, LysR family; B1817, cytochrome-dependent L-lactate dehydrogenase; B1818, demethylmenaquinone methyltransferase.

(A) PHA synthesized by IF017/pBPP-*phaC*<sub>AR</sub>

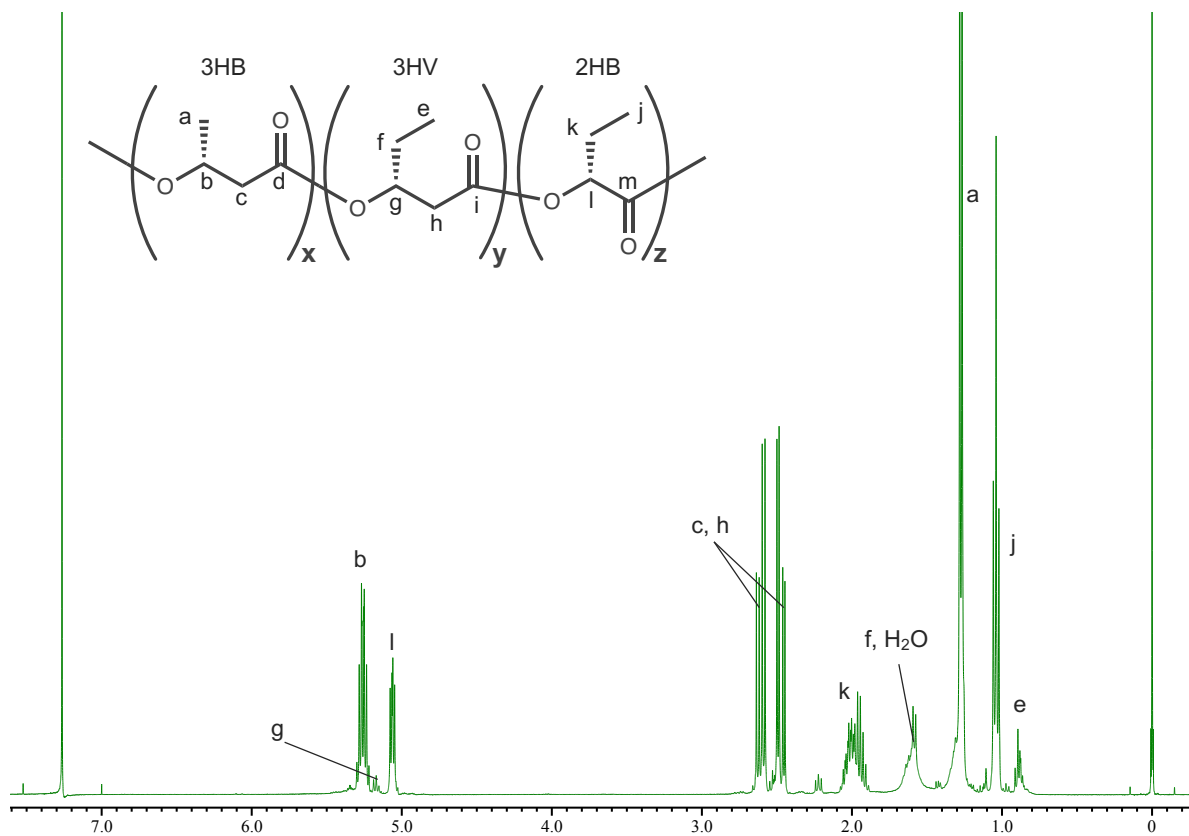

(B) PHA synthesized by IF017/pBBR1MCS-2

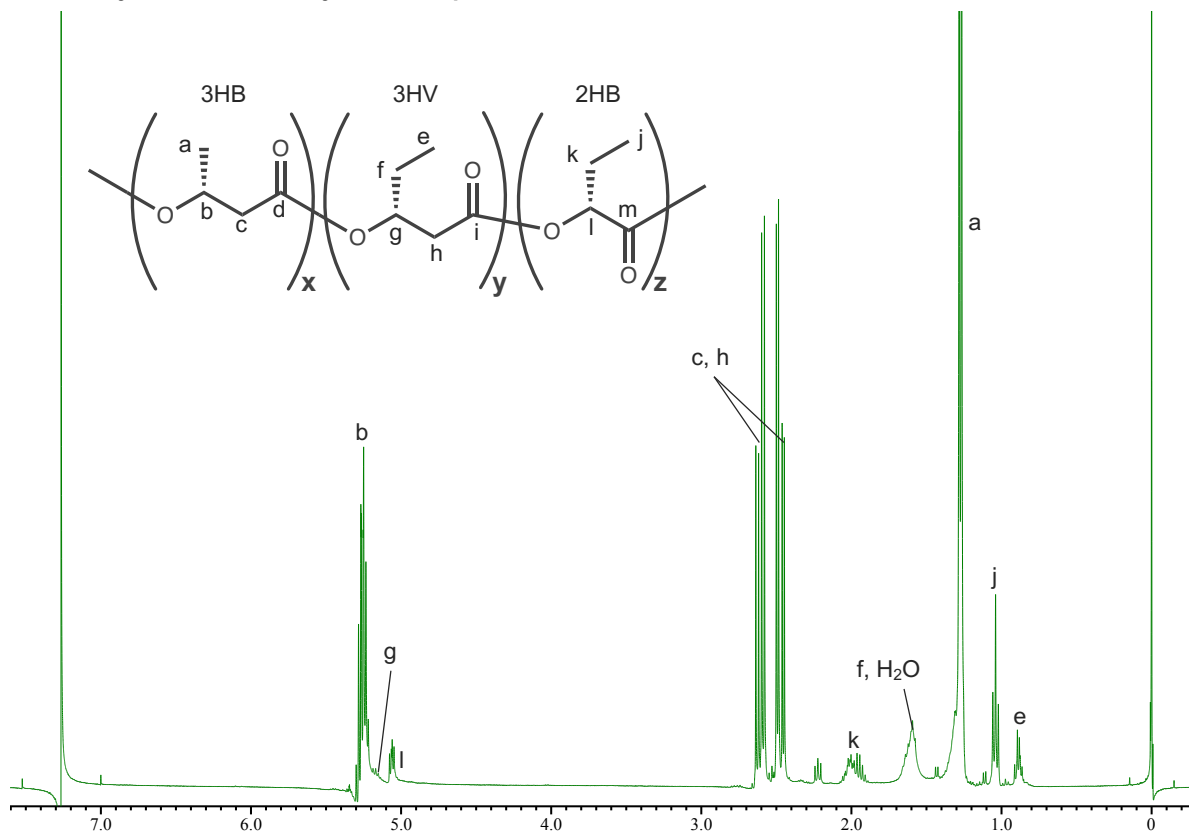

Fig. S3. <sup>1</sup>H NMR analysis of the PHAs synthesized by *R. eutropha* IF017/pBPP-*phaC*<sub>AR</sub> (A) and IF017/pBBR1MCS-2 (B).

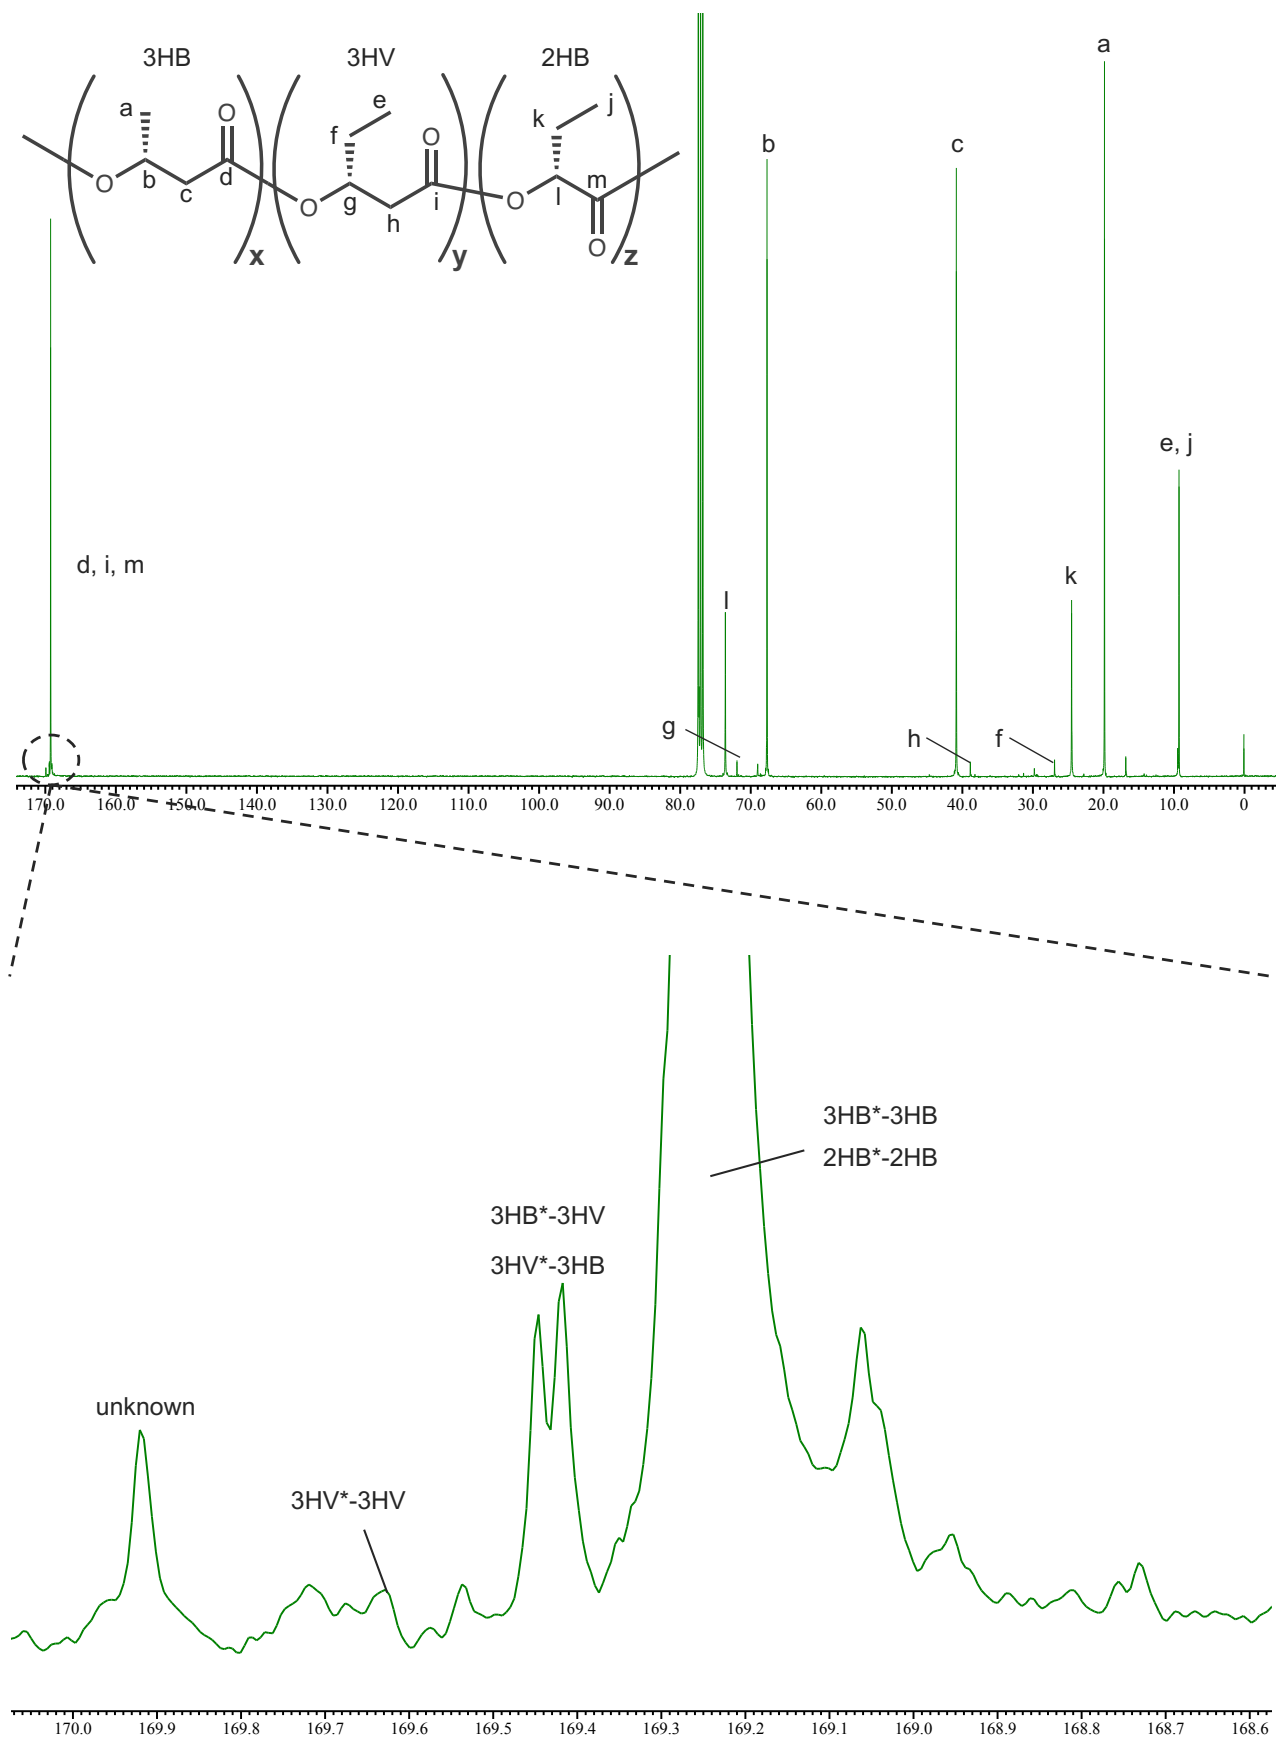

Fig. S4.  $^{13}\text{C}$  NMR analysis of the PHA synthesized by *R. eutropha* IF017/pBPP-*phaC*<sub>AR</sub>.

(A) THF-insoluble fraction

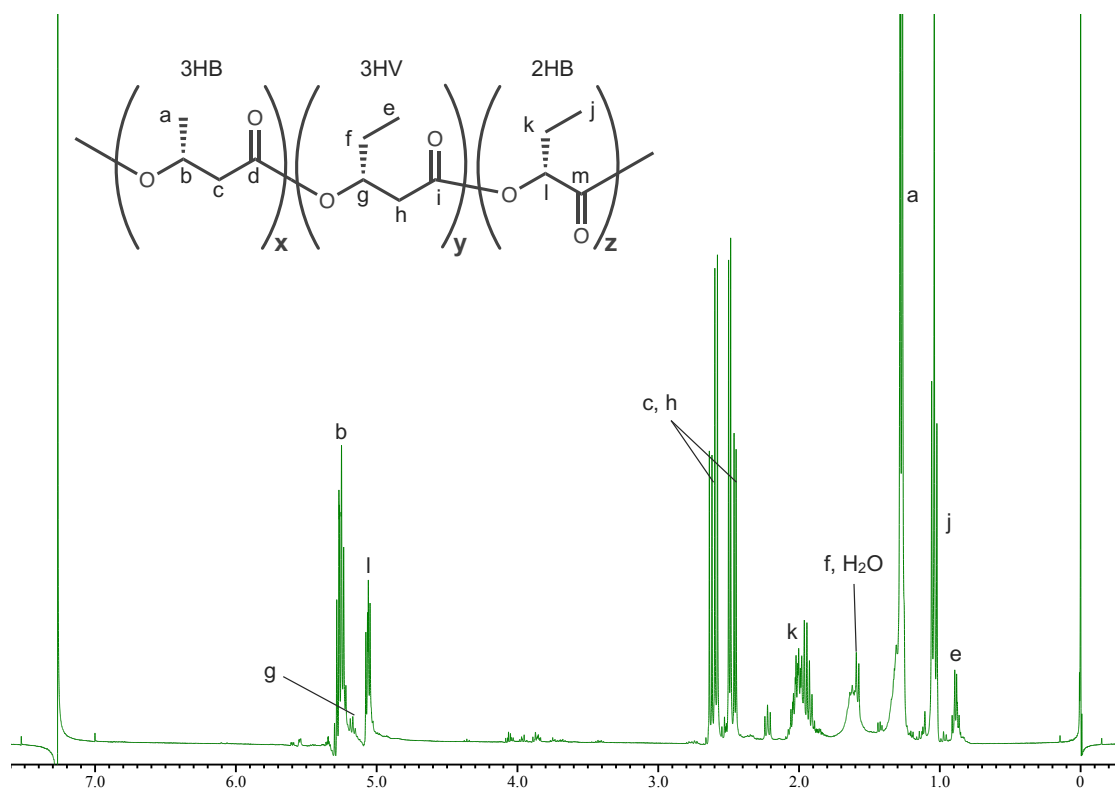

(B) THF-soluble fraction

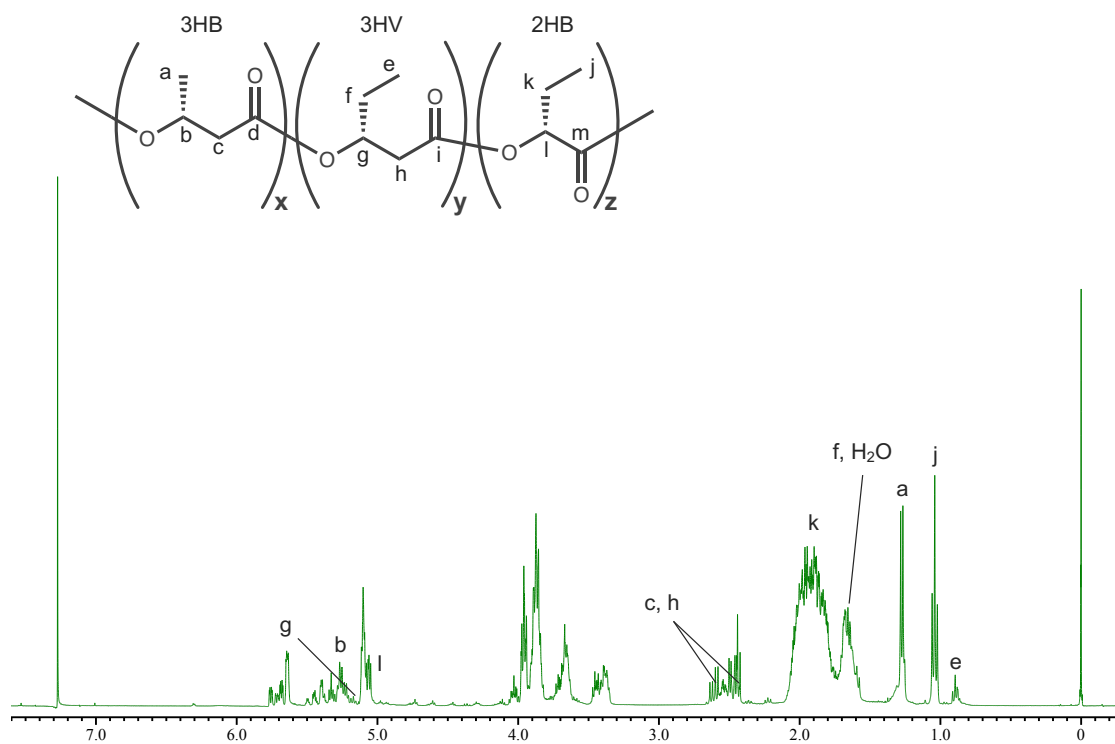

Fig. S5. Verification of block-copolymerization property of PHAs synthesized by the engineered *R. eutropha* by solvent fractionation. Full spectra of  $^1\text{H}$  NMR of the THF-insoluble fraction (A) and soluble fraction (B) of PHA extracted from IF017/pBPP-*pha*<sub>CA</sub>R.

Table S1. Primers used in this study.

| Name                                       | Sequence (5' → 3')                                             | Note                                                                   |
|--------------------------------------------|----------------------------------------------------------------|------------------------------------------------------------------------|
| phaCar_Fw                                  | AATAGTGACGGCAGAGACAATCAAATCATGAGCC<br>AACCATCTTATGGCCCGC       |                                                                        |
| phaCar_Rv                                  | TGCAGGCCTGCCGGCGCCGTGCATATGCAAGCGTC<br>ATGCCTTGGCTTTGACGTATCGC | For construction of<br>pK18ms-CarAB'                                   |
| pK18msCAB-invR                             | GCCAGGGCAATGCCCGGAGCCGGTTCCG                                   |                                                                        |
| pK18msCAB-invF                             | CCCTCCCGTTTCCATTGAAAGGA                                        |                                                                        |
| pEE32R-CAcup-inv                           | GTGCTCTCCTTACCCACACCCGA                                        |                                                                        |
| phaPRe-inv2                                | TAATGCCTGCGTTGAAGATGGAC                                        |                                                                        |
| ldhA-hadA-inf_Fw                           | CTCGGGTGTGGGTGAAGGAGAGCACATGAAAATCC<br>TGGTGTGGAGCG            | For construction of<br>pK18ms-P1udP1-<br>ldhA <i>Cd</i> hadA <i>Cd</i> |
| ldhA-haA-inf_Rv                            | GGTCCATCTTCAACGCAGGCAGTTATTAATAGCGGA<br>CCACTTACTGTC           |                                                                        |
| H16_A0666_ud1000_XbaI_Fw                   | GCTCTAGACGCAGTGCCTGCGTGGTGCCGA                                 |                                                                        |
| H16_A0666_ud1000_XbaI_Rv                   | GCTCTAGACAGCGTTTCGCTCAGGCGGCT                                  | For construction of                                                    |
| A0666ud1000-inv1                           | GGTTCGTACCTCCTCAGAC                                            | pK18ms-A0666ud1000                                                     |
| A0666ud1000-inv2                           | AGGTTCCGCCTGCGGCGGACTCG                                        |                                                                        |
| H16_B0460_ud980_XbaI_Fw                    | GCTCTAGATGGTTGCCGAACCGGCCCGTTCC                                |                                                                        |
| H16_B0460_ud980_HindIII_Rv                 | CCCAAGCTTGGTGAAGGCCAGCCCTGGACTTCAC                             | For construction of                                                    |
| B0460ud980-inv1                            | GGGAACCTCCCTTGAAAAAACAAAAAGCTGCCG                              | pK18ms-B0460ud980                                                      |
| B0460ud980-inv2                            | TAGCGTCTATGAGGCGTCCGGGCCGAAGCTGGCC                             |                                                                        |
| H16_B1817_ud980_XbaI_Fw                    | GCTCTAGACCTTGGCATGAAGGCCGAAACC                                 |                                                                        |
| H16_B1817_ud980_HindIII_Rv                 | CCCAAGCTTATCGATGTCGATGGTGTGCGCAGC                              | For construction of                                                    |
| B1817ud980-inv1                            | TTGGCGGCGCAAGGTACCTGCGCCGCTTGC                                 | pK18ms-B1817ud980                                                      |
| B1817ud980-inv3                            | GACATCGGCCCTGCCTGCATCC                                         |                                                                        |
| H16_A3091_ud980_XbaI_Fw                    | GCTCTAGAGGCAATCCGAGTAATTTTCTCG                                 |                                                                        |
| H16_A3091_ud980_HindIII_Rv                 | CCCAAGCTTGCCGTGCAGCCGCAGCGCCTGGAAGG                            | For construction of                                                    |
| A3091ud980-inv1                            | GCGGGTCTCCGGCGGGTCCGGCGGACGGTG                                 | pK18ms-A3091ud980                                                      |
| A3091ud980-inv2                            | GGCGTGCCGAGCTGATGGCTCCATGTTCAACC                               |                                                                        |
| H16_B0091-B0092-<br>B0093_ud980_XbaI_Fw    | GCTCTAGATGTTCCGCATCCCGGGCGTGAT                                 |                                                                        |
| H16_B0091-B0092-<br>B0093_ud980_HindIII_Rv | CCCAAGCTTAGCCGCCCGCAAGCCAGCCAGCG                               | For construction of                                                    |
| B0091-B0092-B0093ud980-inv1                | GTCTCGCTCCGGACGTGCTGGGGTTCGCACG                                | pK18ms-B0091-<br>B0092-B0093ud980                                      |
| B0091-B0092-B0093ud980-inv2                | TCCGTCATCACGGGCGGAGCGGTT                                       |                                                                        |
| H16_A1681-A1682_up-inf_Fw                  | TCGAGCTCGGTACCCTGCTGCGTGAAGCCACCTCG<br>CTGTGC                  |                                                                        |
| H16_A1681-A1682_up-inf_Rv                  | GGCCAACAGCCGTGTGATGTGTCTCCGCGCGAAT<br>CGC                      | For construction of                                                    |
| H16_A1681-A1682_down-inf_Fw                | CCGCGGAGACACATCACACGGCTGTTGGCCTCAAA<br>TCG                     | pK18ms-A1681-<br>A1682ud900                                            |
| H16_A1681-A1682_down-inf_Rv                | CTCTAGAGGATCCCCGCCACCGGCTGACGCAGGCA<br>AGGGAC                  |                                                                        |
| pBPP-phaCar-inf_Fw                         | GGAGGTATATACATATGAGCCAACCATCTTATGGCC                           |                                                                        |
| pBPP-phaCar-inf_Rv                         | CGACTCTAGAGGATCTCATGCCTTGGCTTTGACGTA<br>TCGC                   | For construction of<br>pBPP-phaCAR                                     |

Table S2. PHA production by engineered *R. eutropha* strains on glucose as sole carbon source.

| Entry | Strain | Dry cell weight<br>[g/L] | Residual cell weight<br>[g/L] | PHA<br>[g/L] | PHA content<br>[wt%] | Composition [mol%] |             |              |
|-------|--------|--------------------------|-------------------------------|--------------|----------------------|--------------------|-------------|--------------|
|       |        |                          |                               |              |                      | 3HB                | 3HV         | 2HB          |
| 1     | IF001  | 2.86 ± 0.14              | 1.73 ± 0.05                   | 1.13 ± 0.19  | 39.35 ± 4.71         | 99.89 ± 0.02       | 0.11 ± 0.02 | Not detected |
| 2     | IF002  | 2.90 ± 0.05              | 1.59 ± 0.05                   | 1.31 ± 0.04  | 45.24 ± 1.21         | 99.86 ± 0.01       | 0.07 ± 0.00 | 0.07 ± 0.00  |
| 3     | IF017  | 2.71 ± 0.06              | 1.37 ± 0.06                   | 1.34 ± 0.04  | 49.46 ± 1.39         | 99.88 ± 0.00       | 0.05 ± 0.01 | 0.07 ± 0.00  |
| 4     | IF018  | 2.92 ± 0.01              | 1.47 ± 0.10                   | 1.45 ± 0.11  | 49.55 ± 3.66         | 99.92 ± 0.00       | 0.05 ± 0.00 | 0.03 ± 0.00  |
| 5     | IF019  | 2.65 ± 0.03              | 1.36 ± 0.03                   | 1.29 ± 0.04  | 48.58 ± 1.10         | 99.86 ± 0.01       | 0.05 ± 0.01 | 0.09 ± 0.01  |

The cells were cultivated in a 100 mL phosphate-limited mineral salt medium containing 2% (w/v) glucose for 72 h at 30°C. All cultivations were performed in triplicate, and the data are expressed as the mean ± standard deviation.



Table S3. Similarities of lactate dehydrogenase (LDH) homologs in *R. eutropha*.

| Queries       | Hits                   | KEGG annotation                            | Identity / overlap |
|---------------|------------------------|--------------------------------------------|--------------------|
| <b>D-LDHs</b> |                        |                                            |                    |
| H16_A1681     | b1380 <sup>a)</sup>    | D-Lactate dehydrogenase (LdhA)             | 50.3% / 328 a.a.   |
| H16_A1682     | b1380 <sup>a)</sup>    | D-Lactate dehydrogenase (LdhA)             | 50.3% / 328 a.a.   |
| H16_A3091     | 197257 <sup>b)</sup>   | Lactate dehydrogenase D (LDHD)             | 49.7% / 477 a.a.   |
| <b>L-LDHs</b> |                        |                                            |                    |
| H16_A0666     | b0801 <sup>a)</sup>    | Hydroxycarboxylate dehydrogenase B (HcxB)  | 37.5% / 323 a.a.   |
| H16_B0460     | b3605 <sup>a)</sup>    | L-Lactate dehydrogenase (LldD)             | 44.1% / 381 a.a.   |
| H16_B1817     | b3605 <sup>a)</sup>    | L-Lactate dehydrogenase (LldD)             | 37.2% / 371 a.a.   |
| H16_B0091     | BSU34040 <sup>c)</sup> | Lactate utilization protein B (LutB, YvfW) | 40.4% / 474 a.a.   |
| H16_B0092     | BSU34030 <sup>c)</sup> | Lactate utilization protein C (LutC, YvbY) | 26.0% / 123 a.a.   |
| H16_B0093     | BSU34050 <sup>c)</sup> | Lactate utilization protein A (LutA, YvfV) | 44.2% / 240 a.a.   |

a) from *Escherichia coli* K12 MG1655, b) from *Homo sapiens* (human), c) from *Bacillus subtilis* subsp. *subtilis* 168

Table S4. PHA production by engineered *R. eutropha* strains on glucose supplemented with L-valine.

| Entry | Strain | Dry cell weight [g/L] | Residual cell weight [g/L] | PHA [g/L]   | PHA content [wt%] | Composition [mol%] |             |              |
|-------|--------|-----------------------|----------------------------|-------------|-------------------|--------------------|-------------|--------------|
|       |        |                       |                            |             |                   | 3HB                | 3HV         | 2HB          |
| 6     | IF001  | 3.83 ± 0.05           | 2.19 ± 0.31                | 1.64 ± 0.34 | 42.73 ± 8.53      | 99.87 ± 0.01       | 0.13 ± 0.01 | Not detected |
| 7     | IF002  | 3.30 ± 0.18           | 1.59 ± 0.05                | 1.71 ± 0.22 | 51.65 ± 3.82      | 99.78 ± 0.01       | 0.12 ± 0.01 | 0.11 ± 0.01  |
| 8     | IF017  | 2.88 ± 0.07           | 1.57 ± 0.05                | 1.31 ± 0.02 | 45.62 ± 0.54      | 99.64 ± 0.02       | 0.13 ± 0.01 | 0.23 ± 0.02  |
| 9     | IF018  | 3.30 ± 0.07           | 1.66 ± 0.04                | 1.64 ± 0.07 | 49.63 ± 1.39      | 99.79 ± 0.01       | 0.10 ± 0.01 | 0.11 ± 0.01  |
| 10    | IF019  | 2.70 ± 0.07           | 1.57 ± 0.06                | 1.13 ± 0.04 | 41.96 ± 1.26      | 99.65 ± 0.03       | 0.12 ± 0.01 | 0.23 ± 0.03  |

The cells were cultivated in a 100 mL phosphate-limited mineral salt medium containing 2% (w/v) glucose supplemented with 0.05% (w/v) L-valine for 96 h at 30°C.

All cultivations were performed in triplicate, and the data are expressed as the mean ± standard deviation.

Table S5. PHA production by engineered *R. eutropha* strains on glucose supplemented with sodium (*RS*)-2HB and L-valine.

| Entry | Strain | Dry cell weight<br>[g/L] | Residual cell weight<br>[g/L] | PHA<br>[g/L] | PHA content<br>[wt%] | Composition [mol%] |             |              |
|-------|--------|--------------------------|-------------------------------|--------------|----------------------|--------------------|-------------|--------------|
|       |        |                          |                               |              |                      | 3HB                | 3HV         | 2HB          |
| 11    | IF001  | 1.91 ± 0.04              | 1.59 ± 0.03                   | 0.32 ± 0.01  | 16.64 ± 0.37         | 97.60 ± 0.10       | 2.40 ± 0.10 | Not detected |
| 12    | IF002  | 1.54 ± 0.05              | 1.30 ± 0.04                   | 0.24 ± 0.02  | 15.84 ± 0.55         | 89.23 ± 0.54       | 2.30 ± 0.02 | 8.47 ± 0.53  |
| 13    | IF017  | 1.57 ± 0.03              | 1.36 ± 0.04                   | 0.21 ± 0.01  | 13.36 ± 0.71         | 88.19 ± 0.26       | 1.12 ± 0.13 | 10.68 ± 0.17 |
| 14    | IF018  | 1.18 ± 0.02              | 1.03 ± 0.01                   | 0.15 ± 0.01  | 12.63 ± 1.00         | 85.14 ± 0.16       | 6.01 ± 0.27 | 8.85 ± 0.23  |
| 15    | IF019  | 1.23 ± 0.01              | 1.11 ± 0.00                   | 0.13 ± 0.00  | 10.45 ± 0.16         | 86.10 ± 0.29       | 3.17 ± 0.20 | 10.73 ± 0.44 |

The cells were cultivated in a 100 mL phosphate-limited mineral salt medium containing 2% (w/v) glucose supplemented with 0.25% (w/v) sodium (*RS*)-2HB and 0.05% (w/v) L-valine for 120 h at 30°C.

All cultivations were performed in triplicate, and the data are expressed as the mean ± standard deviation.

Table S6. PHA production by PhaC<sub>AR</sub>-overexpressed *R. eutropha* strain on glucose supplemented with sodium (*RS*)-2HB and L-valine.

| Entry | Host  | Plasmid                        | Time [h] | Dry cell weight [g/L] | Residual cell weight [g/L] | PHA [g/L]   | PHA content [wt%] | Composition [mol%] |             |              |
|-------|-------|--------------------------------|----------|-----------------------|----------------------------|-------------|-------------------|--------------------|-------------|--------------|
|       |       |                                |          |                       |                            |             |                   | 3HB                | 3HV         | 2HB          |
| 16    |       | pBBR1MCS-2                     | 120      | 1.68 ± 0.02           | 1.46 ± 0.02                | 0.22 ± 0.00 | 13.11 ± 0.30      | 89.29 ± 0.18       | 1.23 ± 0.05 | 9.48 ± 0.17  |
|       | IF017 |                                |          |                       |                            |             |                   |                    |             |              |
| 17    |       | pBPP- <i>phaC<sub>AR</sub></i> | 144      | 2.05 ± 0.03           | 1.63 ± 0.02                | 0.42 ± 0.02 | 20.64 ± 0.71      | 63.18 ± 0.82       | 1.83 ± 0.16 | 34.99 ± 0.78 |

The cells were cultivated in a 100 mL phosphate-limited mineral salt medium containing 2% (w/v) glucose with 0.25% (w/v) sodium (*RS*)-2HB and 0.05% (w/v) L-valine at 30 °C.

All cultivations were performed in triplicate, and the data are expressed as the mean ± standard deviation.
